# Supplementary material for: Enzymatic Assembly of Chitosan-Based Network Polysaccharides and Their Encapsulation and Release of Fluorescent Dye
Source: MDPI journal article supplement (doi:10.3390/molecules29081804), 2024-04-16
Supplement: s1 [file s1]

## **Supporting Information**

### **Enzymatic assembly of chitosan-based network polysaccharides and their encapsulation and release of fluorescent dye**

Masayasu Totani, Aina Nakamichi, and Jun-ichi Kadokawa\*

*Graduate School of Science and Engineering, Kagoshima University, 1-21-40  
Korimoto, Kagoshima 890-0065, Japan*

\* Corresponding author: E-mail: kadokawa@eng.kagoshima-u.ac.jp

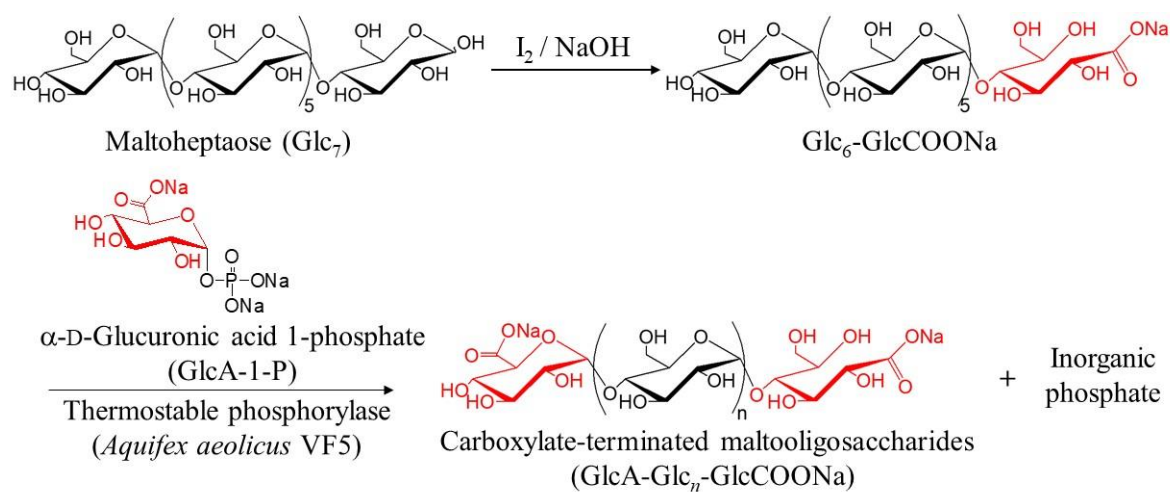

**Figure S1.** Synthesis of carboxylate-terminated maltooligosaccharides (GlcAGlc<sub>n</sub>-GlcCOONa).

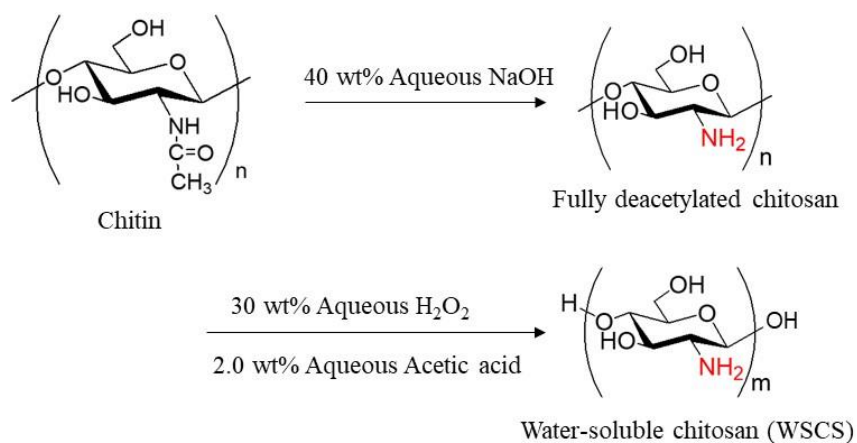

**Figure S2.** Preparation of water-soluble chitosan (WSCS).
